# Supplementary material for: Horizontal versus Familial Transmission of Helicobacter pylori
Source: PubMed Central journal article supplement (PMC2563686; doi:10.1371/journal.ppat.1000180), 2008-10-24
Supplement: ppat.1000180.s003.pdf [file ppat.1000180.s003.pdf]

Table S3. ST and allele designations for *Helicobacter pylori* isolates from multiple families

| ST  | Group           | Country      | Strain  | Allele designation |      |      |      |      |      |      |
|-----|-----------------|--------------|---------|--------------------|------|------|------|------|------|------|
|     |                 |              |         | atpA               | efp  | mutY | ppa  | trpC | ureI | yphC |
| 501 | Ogies Family 13 | South Africa | SA34A   | 413                | 415  | 365  | 400  | 414  | 371  | 365  |
| 502 | Ogies Family 12 | South Africa | SA162A  | 320                | 324  | 398  | 414  | 324  | 1603 | 330  |
| 502 | Ogies Family 12 | South Africa | SA162C  | 320                | 324  | 398  | 414  | 324  | 1603 | 330  |
| 503 | Ogies Family 13 | South Africa | SA175A  | 841                | 422  | 406  | 422  | 420  | 1604 | 420  |
| 504 | Ogies Family 12 | South Africa | SA302A  | 1547               | 510  | 414  | 510  | 421  | 511  | 510  |
| 504 | Ogies Family 12 | South Africa | SA302C  | 1547               | 510  | 414  | 510  | 421  | 511  | 510  |
| 505 | Ogies Family 13 | South Africa | SA40A   | 1548               | 540  | 417  | 429  | 1569 | 288  | 1552 |
| 506 | Ogies Family 12 | South Africa | SA161A  | 1549               | 1464 | 419  | 1259 | 1570 | 1605 | 1599 |
| 506 | Ogies Family 12 | South Africa | SA161C  | 1549               | 1464 | 419  | 1259 | 1570 | 1605 | 1599 |
| 507 | Ogies Family 12 | South Africa | SA160A  | 1550               | 1465 | 425  | 1495 | 1571 | 1606 | 1600 |
| 507 | Ogies Family 12 | South Africa | SA160C  | 1550               | 1465 | 425  | 1495 | 1571 | 1606 | 1600 |
| 508 | Ogies Family 12 | South Africa | SA170A  | 1551               | 1466 | 1549 | 1496 | 1572 | 1607 | 1601 |
| 508 | Ogies Family 12 | South Africa | SA170C  | 1551               | 1466 | 1549 | 1496 | 1572 | 1607 | 1601 |
| 509 | Ogies Family 13 | South Africa | SA37A   | 1552               | 1467 | 1550 | 1497 | 1573 | 274  | 1602 |
| 509 | Ogies Family 13 | South Africa | SA37C   | 1552               | 1467 | 1550 | 1497 | 1573 | 274  | 1602 |
| 510 | Ogies Family 12 | South Africa | SA303A  | 1553               | 1468 | 1551 | 1498 | 1574 | 1608 | 1603 |
| 511 | Ogies Family 12 | South Africa | SA173A  | 1554               | 1469 | 1552 | 1499 | 1575 | 516  | 1604 |
| 511 | Ogies Family 12 | South Africa | SA173C  | 1554               | 1469 | 1552 | 1499 | 1575 | 516  | 1604 |
| 512 | Ogies Family 13 | South Africa | SA233A  | 1555               | 1470 | 1553 | 429  | 1576 | 1609 | 1605 |
| 512 | Ogies Family 13 | South Africa | SA233C  | 1555               | 1470 | 1553 | 429  | 1576 | 1609 | 1605 |
| 513 | Ogies Family 12 | South Africa | SA169A  | 1556               | 1471 | 1554 | 279  | 1577 | 315  | 288  |
| 514 | Ogies Family 12 | South Africa | SA163A1 | 280                | 278  | 294  | 280  | 1578 | 280  | 295  |
| 514 | Ogies Family 12 | South Africa | SA163C1 | 280                | 278  | 294  | 280  | 1578 | 280  | 295  |
| 514 | Ogies Family 12 | South Africa | SA210A1 | 280                | 278  | 294  | 280  | 1578 | 280  | 295  |
| 514 | Ogies Family 12 | South Africa | SA210C1 | 280                | 278  | 294  | 280  | 1578 | 280  | 295  |
| 514 | Ogies Family 12 | South Africa | SA300A  | 280                | 278  | 294  | 280  | 1578 | 280  | 295  |
| 514 | Ogies Family 12 | South Africa | SA300C  | 280                | 278  | 294  | 280  | 1578 | 280  | 295  |
| 514 | Ogies Family 12 | South Africa | SA31C   | 280                | 278  | 294  | 280  | 1578 | 280  | 295  |
| 514 | Ogies Family 12 | South Africa | SA174A  | 1557               | 1472 | 1555 | 1500 | 1579 | 1610 | 1606 |
| 516 | Ogies Family 13 | South Africa | SA221A  | 291                | 273  | 1556 | 291  | 1580 | 273  | 273  |
| 516 | Ogies Family 13 | South Africa | SA221C  | 291                | 273  | 1556 | 291  | 1580 | 273  | 273  |
| 517 | Ogies Family 13 | South Africa | SA34C   | 413                | 415  | 365  | 400  | 414  | 1611 | 365  |

For families from Ogies, the strain designation includes A for antrum or C for corpus. In some cases, additional numbers indicate which of multiple single colonies was chosen

Because only one isolate was available per individual from other families, the strain designation there is the same as the individual designation

ST numbers are cognate with Figures 1-3.

Alleles that were present in isolates from other global sources are indicated in red

Table S3. ST and allele designations for *Helicobacter pylori* isolates from multiple families

| ST  | Group           | Country      | Strain    | Allele designation |            |             |            |             |             |             |
|-----|-----------------|--------------|-----------|--------------------|------------|-------------|------------|-------------|-------------|-------------|
|     |                 |              |           | <i>atpA</i>        | <i>efp</i> | <i>mutY</i> | <i>ppa</i> | <i>trpC</i> | <i>ureI</i> | <i>ypbC</i> |
| 518 | Ogies Family 12 | South Africa | SA303C    | 1553               | 1468       | 1557        | 1498       | 1574        | 1612        | 1603        |
| 519 | Ogies Family 12 | South Africa | SA169C    | 1556               | 1471       | 1554        | 279        | 1577        | 1613        | 288         |
| 520 | Ogies Family 13 | South Africa | SA40C     | 1548               | 540        | 417         | 429        | 1569        | 288         | 1607        |
| 521 | Ogies Family 13 | South Africa | SA220A    | 320                | 279        | 1558        | 296        | 1581        | 279         | 279         |
| 521 | Ogies Family 13 | South Africa | SA220C    | 320                | 279        | 1558        | 296        | 1581        | 279         | 279         |
| 522 | Ogies Family 12 | South Africa | SA301C    | 320                | 1473       | 1559        | 414        | 324         | 284         | 330         |
| 523 | Ogies Family 13 | South Africa | SA174C    | 291                | 273        | 273         | 1501       | 1582        | 273         | 273         |
| 524 | Ogies Family 13 | South Africa | SA35C     | 280                | 278        | 1560        | 278        | 1583        | 1614        | 306         |
| 525 | Ogies Family 13 | South Africa | SA175C    | 1558               | 422        | 1561        | 422        | 420         | 1615        | 420         |
| 526 | Ogies Family 13 | South Africa | SA36C     | 1559               | 1474       | 1562        | 1502       | 1584        | 288         | 1608        |
| 527 | Ogies Family 12 | South Africa | SA166A    | 1560               | 1475       | 1563        | 279        | 1585        | 288         | 1609        |
| 528 | Ogies Family 12 | South Africa | SA301A    | 320                | 1473       | 1564        | 414        | 324         | 284         | 330         |
| 529 | Ogies Family 13 | South Africa | SA35A     | 280                | 278        | 1560        | 278        | 1583        | 1616        | 306         |
| 530 | Ogies Family 12 | South Africa | SA171A1   | 515                | 510        | 511         | 510        | 511         | 511         | 510         |
| 530 | Ogies Family 12 | South Africa | SA171C1   | 515                | 510        | 511         | 510        | 511         | 511         | 510         |
| 530 | Ogies Family 12 | South Africa | SA172A1-1 | 515                | 510        | 511         | 510        | 511         | 511         | 510         |
| 533 | Houston, TX     | USA          | H1        | 411                | 413        | 411         | 412        | 412         | 413         | 417         |
| 534 | Ogies Family 12 | South Africa | SA226     | 1561               | 1476       | 577         | 571        | 1586        | 1617        | 304         |
| 535 | Houston, TX     | USA          | H2-4      | 412                | 414        | 412         | 201        | 269         | 414         | 418         |
| 536 | Houston, TX     | USA          | H2        | 205                | 200        | 413         | 413        | 413         | 415         | 419         |
| 536 | Houston, TX     | USA          | H2-1      | 205                | 200        | 413         | 413        | 413         | 415         | 419         |
| 537 | Houston, TX     | USA          | H3-1      | 514                | 507        | 508         | 505        | 513         | 516         | 519         |
| 538 | Houston, TX     | USA          | H3        | 414                | 416        | 415         | 415        | 415         | 416         | 421         |
| 539 | Houston, TX     | USA          | H1-1      | 415                | 417        | 416         | 416        | 416         | 417         | 422         |
| 540 | Houston, TX     | USA          | H2-2      | 416                | 200        | 413         | 413        | 413         | 415         | 419         |
| 541 | Houston, TX     | USA          | H2-3      | 205                | 200        | 413         | 413        | 413         | 418         | 419         |
| 542 | Houston, TX     | USA          | H1-2      | 417                | 418        | 663         | 417        | 417         | 419         | 423         |
| 543 | Bogota          | Colombia     | C5        | 418                | 419        | 418         | 226        | 418         | 420         | 424         |
| 544 | Bogota          | Colombia     | C5-1      | 419                | 420        | 728         | 266        | 419         | 421         | 425         |
| 545 | Bogota          | Colombia     | C5-2      | 420                | 268        | 420         | 418        | 1546        | 420         | 426         |
| 546 | Bogota          | Colombia     | C5-3      | 421                | 268        | 420         | 418        | 1546        | 420         | 426         |
| 546 | Bogota          | Colombia     | C5-4      | 421                | 268        | 420         | 418        | 1546        | 420         | 426         |

Table S3. ST and allele designations for *Helicobacter pylori* isolates from multiple families

| ST  | Group           | Country      | Strain  | Allele designation |      |      |      |      |      |      |
|-----|-----------------|--------------|---------|--------------------|------|------|------|------|------|------|
|     |                 |              |         | atpA               | efp  | mutY | ppa  | trpC | ureI | ypbC |
| 547 | Bogota          | Colombia     | C6      | 422                | 421  | 421  | 228  | 705  | 422  | 427  |
| 548 | Bogota          | Colombia     | C6-1    | 423                | 421  | 422  | 228  | 705  | 422  | 427  |
| 549 | Bogota          | Colombia     | C6-2    | 424                | 1448 | 423  | 419  | 422  | 423  | 428  |
| 550 | Seoul           | Korea        | K3      | 425                | 423  | 424  | 420  | 423  | 424  | 429  |
| 551 | Seoul           | Korea        | K3-1    | 426                | 424  | 44   | 421  | 424  | 425  | 430  |
| 551 | Seoul           | Korea        | K3-2    | 426                | 424  | 44   | 421  | 424  | 425  | 430  |
| 551 | Seoul           | Korea        | K3-4    | 426                | 424  | 44   | 421  | 424  | 425  | 430  |
| 552 | Bogota          | Colombia     | C7-1    | 427                | 425  | 1258 | 252  | 425  | 426  | 431  |
| 553 | Seoul           | Korea        | K1-2    | 428                | 426  | 426  | 968  | 426  | 427  | 432  |
| 554 | Seoul           | Korea        | K1-4    | 429                | 427  | 427  | 423  | 427  | 428  | 433  |
| 555 | Seoul           | Korea        | K5-2    | 54                 | 428  | 428  | 424  | 428  | 429  | 434  |
| 555 | Seoul           | Korea        | K5-3    | 54                 | 428  | 428  | 424  | 428  | 429  | 434  |
| 556 | Bogota          | Colombia     | C7-3    | 430                | 425  | 1258 | 252  | 425  | 426  | 431  |
| 557 | Seoul           | Korea        | K1      | 431                | 429  | 429  | 425  | 429  | 430  | 435  |
| 557 | Seoul           | Korea        | K1-1    | 431                | 429  | 429  | 425  | 429  | 430  | 435  |
| 558 | Bogota          | Colombia     | C7      | 423                | 430  | 430  | 228  | 430  | 431  | 436  |
| 558 | Bogota          | Colombia     | C7-2    | 423                | 430  | 430  | 228  | 430  | 431  | 436  |
| 559 | Seoul           | Korea        | K5-1    | 54                 | 428  | 428  | 424  | 428  | 432  | 437  |
| 560 | Seoul           | Korea        | K5      | 54                 | 431  | 428  | 424  | 428  | 433  | 434  |
| 561 | Seoul           | Korea        | K1-3    | 432                | 432  | 431  | 426  | 431  | 434  | 438  |
| 562 | Seoul           | Korea        | K3-3    | 426                | 433  | 44   | 421  | 424  | 425  | 430  |
| 563 | Seoul           | Korea        | K3-5    | 426                | 424  | 44   | 421  | 424  | 435  | 430  |
| 564 | Ogies Family 12 | South Africa | SA30A1  | 295                | 278  | 1565 | 299  | 280  | 267  | 1610 |
| 564 | Ogies Family 12 | South Africa | SA30C1  | 295                | 278  | 1565 | 299  | 280  | 267  | 1610 |
| 565 | Ogies Family 12 | South Africa | SA29A1  | 1562               | 1475 | 1566 | 429  | 1569 | 1608 | 1611 |
| 566 | Ogies Family 12 | South Africa | SA222A1 | 1563               | 1477 | 1567 | 1503 | 1587 | 1618 | 1612 |
| 566 | Ogies Family 12 | South Africa | SA222C1 | 1563               | 1477 | 1567 | 1503 | 1587 | 1618 | 1612 |
| 567 | Ogies Family 12 | South Africa | SA164A1 | 1547               | 510  | 511  | 510  | 511  | 511  | 510  |
| 567 | Ogies Family 12 | South Africa | SA164C1 | 1547               | 510  | 511  | 510  | 511  | 511  | 510  |
| 567 | Ogies Family 12 | South Africa | SA165A1 | 1547               | 510  | 511  | 510  | 511  | 511  | 510  |
| 567 | Ogies Family 12 | South Africa | SA165C1 | 1547               | 510  | 511  | 510  | 511  | 511  | 510  |
| 568 | Ogies Family 12 | South Africa | SA224A1 | 1564               | 1478 | 513  | 279  | 324  | 527  | 512  |

Table S3. ST and allele designations for *Helicobacter pylori* isolates from multiple families

| ST  | Group           | Country      | Strain  | Allele designation |      |      |      |      |      |      |
|-----|-----------------|--------------|---------|--------------------|------|------|------|------|------|------|
|     |                 |              |         | atpA               | efp  | mutY | ppa  | trpC | ureI | ypbC |
| 568 | Ogies Family 12 | South Africa | SA224C1 | 1564               | 1478 | 513  | 279  | 324  | 527  | 512  |
| 568 | Ogies Family 12 | South Africa | SA29C1  | 1564               | 1478 | 513  | 279  | 324  | 527  | 512  |
| 569 | Ogies Family 12 | South Africa | SA253A1 | 1565               | 1479 | 1568 | 1504 | 1588 | 288  | 1613 |
| 569 | Ogies Family 12 | South Africa | SA253C1 | 1565               | 1479 | 1568 | 1504 | 1588 | 288  | 1613 |
| 570 | Ogies Family 12 | South Africa | SA158A1 | 280                | 278  | 294  | 280  | 1589 | 280  | 295  |
| 571 | Ogies Family 12 | South Africa | SA46A1  | 1566               | 1480 | 294  | 267  | 280  | 1619 | 1614 |
| 571 | Ogies Family 12 | South Africa | SA46C1  | 1566               | 1480 | 294  | 267  | 280  | 1619 | 1614 |
| 572 | Ogies Family 12 | South Africa | SA168A1 | 1564               | 1478 | 513  | 279  | 324  | 1620 | 512  |
| 572 | Ogies Family 12 | South Africa | SA168C1 | 1564               | 1478 | 513  | 279  | 324  | 1620 | 512  |
| 573 | Ogies Family 12 | South Africa | SA146A1 | 1567               | 1481 | 297  | 1505 | 1590 | 1621 | 1615 |
| 573 | Ogies Family 12 | South Africa | SA146C1 | 1567               | 1481 | 297  | 1505 | 1590 | 1621 | 1615 |
| 574 | Ogies Family 12 | South Africa | SA252A1 | 320                | 1482 | 513  | 279  | 324  | 1622 | 525  |
| 575 | Ogies Family 12 | South Africa | SA227A1 | 320                | 324  | 324  | 414  | 324  | 1623 | 330  |
| 576 | Ogies Family 12 | South Africa | SA156A1 | 1568               | 1466 | 1569 | 303  | 1591 | 1624 | 320  |
| 576 | Ogies Family 12 | South Africa | SA156C1 | 1568               | 1466 | 1569 | 303  | 1591 | 1624 | 320  |
| 577 | Ogies Family 12 | South Africa | SA45A1  | 1567               | 1483 | 1570 | 1506 | 280  | 1625 | 1616 |
| 578 | Ogies Family 12 | South Africa | SA144A1 | 1569               | 1484 | 1571 | 279  | 1592 | 1626 | 1617 |
| 579 | Ogies Family 12 | South Africa | SA214A1 | 305                | 1464 | 1572 | 1259 | 341  | 1605 | 1599 |
| 579 | Ogies Family 12 | South Africa | SA214C1 | 305                | 1464 | 1572 | 1259 | 341  | 1605 | 1599 |
| 579 | Ogies Family 12 | South Africa | SA215C1 | 305                | 1464 | 1572 | 1259 | 341  | 1605 | 1599 |
| 579 | Ogies Family 12 | South Africa | SA216A1 | 305                | 1464 | 1572 | 1259 | 341  | 1605 | 1599 |
| 579 | Ogies Family 12 | South Africa | SA216C1 | 305                | 1464 | 1572 | 1259 | 341  | 1605 | 1599 |
| 580 | Ogies Family 12 | South Africa | SA47A1  | 1570               | 1485 | 1573 | 1507 | 1593 | 1627 | 1618 |
| 580 | Ogies Family 12 | South Africa | SA47C1  | 1570               | 1485 | 1573 | 1507 | 1593 | 1627 | 1618 |
| 581 | Ogies Family 12 | South Africa | SA155A1 | 1571               | 1486 | 1574 | 1508 | 1594 | 1628 | 1619 |
| 581 | Ogies Family 12 | South Africa | SA155C1 | 1571               | 1486 | 1574 | 1508 | 1594 | 1628 | 1619 |
| 582 | Ogies Family 12 | South Africa | SA213A1 | 271                | 520  | 271  | 1509 | 1595 | 334  | 1620 |
| 583 | Ogies Family 12 | South Africa | SA194A1 | 1572               | 1487 | 278  | 1510 | 1596 | 1629 | 1606 |
| 583 | Ogies Family 12 | South Africa | SA194C1 | 1572               | 1487 | 278  | 1510 | 1596 | 1629 | 1606 |
| 584 | Ogies Family 12 | South Africa | SA144C1 | 1569               | 1484 | 1571 | 279  | 1592 | 1630 | 1617 |
| 585 | Ogies Family 12 | South Africa | SA227C1 | 320                | 324  | 324  | 414  | 324  | 992  | 330  |
| 586 | Ogies Family 12 | South Africa | SA172C1 | 1573               | 1488 | 1575 | 279  | 1597 | 288  | 1621 |

Table S3. ST and allele designations for *Helicobacter pylori* isolates from multiple families

| ST  | Group            | Country      | Strain  | Allele designation |      |      |      |      |      |      |
|-----|------------------|--------------|---------|--------------------|------|------|------|------|------|------|
|     |                  |              |         | atpA               | efp  | mutY | ppa  | trpC | ureI | ypbC |
| 587 | Ogies Family 12  | South Africa | SA157A1 | 1574               | 1489 | 1576 | 1511 | 1598 | 267  | 1622 |
| 587 | Ogies Family 12  | South Africa | SA157C1 | 1574               | 1489 | 1576 | 1511 | 1598 | 267  | 1622 |
| 588 | Ogies Family 12  | South Africa | SA45C1  | 1567               | 1483 | 1570 | 1506 | 280  | 1631 | 1616 |
| 589 | Ogies Family 12  | South Africa | SA158C1 | 280                | 278  | 277  | 280  | 1578 | 280  | 295  |
| 590 | Ogies Family 12  | South Africa | SA252C1 | 529                | 324  | 513  | 279  | 324  | 527  | 512  |
| 591 | Ogies Family 12  | South Africa | SA251C1 | 1575               | 1484 | 1571 | 279  | 1599 | 1632 | 1617 |
| 592 | Ogies Family 12  | South Africa | SA213C1 | 271                | 520  | 271  | 1509 | 1595 | 1633 | 1620 |
| 593 | Ogies Family 12  | South Africa | SA251A1 | 1575               | 1484 | 1571 | 279  | 1592 | 1628 | 1617 |
| 594 | Coventry         | UK           | H3014   | 433                | 434  | 432  | 427  | 433  | 438  | 439  |
| 594 | Coventry         | UK           | H3018   | 433                | 434  | 432  | 427  | 433  | 438  | 439  |
| 595 | Coventry         | UK           | H3016   | 434                | 435  | 433  | 427  | 434  | 438  | 440  |
| 596 | Coventry         | UK           | H3017   | 435                | 434  | 432  | 427  | 433  | 438  | 441  |
| 597 | Northern Ireland | UK           | H3022   | 436                | 436  | 434  | 428  | 435  | 439  | 442  |
| 597 | Northern Ireland | UK           | H3023   | 436                | 436  | 434  | 428  | 435  | 439  | 442  |
