# Supplementary material for: Horizontal versus Familial Transmission of Helicobacter pylori
Source: PubMed Central journal article supplement (PMC2563686; doi:10.1371/journal.ppat.1000180), 2008-10-24
Supplement: ppat.1000180.s004.pdf [file ppat.1000180.s004.pdf]

Table S4. Global sources of alleles in family as well as in global isolates

| Family Source           | Allele<br>(# of family STs)                                                                                                                                                                                                              | Global sources: # of STs                                                                                                                                                                                                                                                                                                                                                                                                                  |
|-------------------------|------------------------------------------------------------------------------------------------------------------------------------------------------------------------------------------------------------------------------------------|-------------------------------------------------------------------------------------------------------------------------------------------------------------------------------------------------------------------------------------------------------------------------------------------------------------------------------------------------------------------------------------------------------------------------------------------|
| Bogota, Colombia        | efp-1448: (1)<br>efp-268: (2)<br>mutY-1258: (2)<br>mutY-728: (1)<br>ppa-226: (1)<br>ppa-228: (3)<br>ppa-252: (2)<br>ppa-266: (1)<br>trpC-1546: (2)<br>trpC-705: (2)<br>Total ST sources:                                                 | Venezuela: 1<br>Capetown, South Africa: 1; Venezuela: 1<br>Philippines: 1; Venezuela: 2<br>Colombia: 1<br>Colombia: 2<br>Colombia: 1<br>Colombia: 1<br>Philippines: 1; Venezuela: 1<br>Venezuela: 1<br>Spain: 1<br>Venezuela: 6; Colombia: 5; Philippines: 2; Spain: 1; Capetown: 1                                                                                                                                                       |
| Coventry or Belfast, UK | None                                                                                                                                                                                                                                     |                                                                                                                                                                                                                                                                                                                                                                                                                                           |
| Houston, TX, U.S.A.     | atpA-205: (2)<br>atpA-514: (1)<br>efp-200: (3)<br>efp-507: (1)<br>mutY-508: (1)<br>mutY-663: (1)<br>ppa-201: (1)<br>ppa-505: (1)<br>trpC-269: (1)<br>trpC-513: (1)<br>ureI-516: (1)<br>yphC-519: (1)<br>Total ST sources:                | Louisiana: 1<br>Houston: 2<br>Louisiana: 3<br>Houston: 2<br>Houston: 2<br>Philippines: 1; Spain: 1<br>Louisiana: 1<br>Houston: 2<br>Capetown, South Africa: 1<br>Houston: 1<br>Houston: 3<br>Houston: 2<br>Houston: 14; Louisiana: 5; Philippines: 1; Spain: 1; Capetown: 1                                                                                                                                                               |
| Soeul, Korea            | atpA-54: (3)<br>mutY-44: (3)<br>ppa-968: (1)<br>Total ST sources:                                                                                                                                                                        | Korea: 1<br>Japan: 1<br>Germany: 1; Houston: 1<br>Korea: 1; Japan: 1; Kazakhstan: 1; Germany: 1; Houston: 1                                                                                                                                                                                                                                                                                                                               |
| Ogies Family 12         | atpA-271: (2)<br>atpA-280: (3)<br>atpA-295: (1)<br>atpA-305: (1)<br>atpA-320: (6)<br>efp-278: (4)<br>efp-324: (4)<br>mutY-271: (2)<br>mutY-277: (1)<br>mutY-278: (1)<br>mutY-294: (3)<br>mutY-297: (1)<br>mutY-324: (2)<br>mutY-577: (1) | Capetown, South Africa: 2<br>Capetown, South Africa: 1<br>Capetown, South Africa: 5<br>Capetown, South Africa: 6<br>Capetown, South Africa: 2; Namibia: 1; Nigeria: 1<br>Capetown, South Africa: 2<br>Capetown, South Africa: 1<br>Capetown, South Africa: 2<br>Capetown, South Africa: 2<br>Capetown, South Africa: 1<br>Capetown, South Africa: 3<br>Capetown, South Africa: 1<br>Capetown, South Africa: 3<br>Namibia: 1; Australia: 1 |

| Family Source   | Allele<br>(# of family STs)                                                       | Global sources: # of STs                          |
|-----------------|-----------------------------------------------------------------------------------|---------------------------------------------------|
|                 | ppa-267: (1)                                                                      | Capetown, South Africa: 1                         |
|                 | ppa-279: (12)                                                                     | Capetown, South Africa: 2                         |
|                 | ppa-280: (3)                                                                      | Capetown, South Africa: 2                         |
|                 | ppa-299: (1)                                                                      | Capetown, South Africa: 4                         |
|                 | ppa-303: (1)                                                                      | Capetown, South Africa: 4                         |
|                 | ppa-571: (1)                                                                      | Australia: 1                                      |
|                 | trpC-280: (4)                                                                     | Capetown, South Africa: 2                         |
|                 | trpC-324: (9)                                                                     | Capetown, South Africa: 1                         |
|                 | trpC-341: (1)                                                                     | Capetown, South Africa: 1                         |
|                 | urel-267: (2)                                                                     | Capetown, South Africa: 1                         |
|                 | urel-280: (3)                                                                     | Capetown, South Africa: 1                         |
|                 | urel-284: (2)                                                                     | Capetown, South Africa: 2                         |
|                 | urel-288: (3)                                                                     | Capetown, South Africa: 1                         |
|                 | urel-315: (1)                                                                     | Capetown, South Africa: 1                         |
|                 | urel-334: (1)                                                                     | Capetown, South Africa: 1                         |
|                 | urel-516: (1)                                                                     | Houston: 3                                        |
|                 | urel-992: (1)                                                                     | Namibia: 4                                        |
|                 | yphC-288: (2)                                                                     | Capetown, South Africa: 1                         |
|                 | yphC-295: (3)                                                                     | Capetown, South Africa: 1                         |
|                 | yphC-304: (1)                                                                     | Capetown, South Africa: 1                         |
|                 | yphC-320: (1)                                                                     | Capetown, South Africa: 3                         |
|                 | yphC-330: (5)                                                                     | Capetown, South Africa: 2                         |
|                 | Total ST sources: Capetown: 63; Namibia: 11; Houston: 3; Australia: 2; Nigeria: 1 |                                                   |
| Ogies Family 13 |                                                                                   |                                                   |
|                 | atpA-280: (2)                                                                     | Capetown, South Africa: 1                         |
|                 | atpA-291: (2)                                                                     | Capetown, South Africa: 1                         |
|                 | atpA-320: (1)                                                                     | Capetown, South Africa: 2; Namibia: 1; Nigeria: 1 |
|                 | efp-273: (2)                                                                      | Capetown, South Africa: 1                         |
|                 | efp-278: (2)                                                                      | Capetown, South Africa: 2                         |
|                 | efp-279: (1)                                                                      | Capetown, South Africa: 7                         |
|                 | mutY-273: (1)                                                                     | Capetown, South Africa: 2                         |
|                 | ppa-278: (2)                                                                      | Capetown, South Africa: 2                         |
|                 | ppa-291: (1)                                                                      | Capetown, South Africa: 1                         |
|                 | ppa-296: (1)                                                                      | Capetown, South Africa: 2                         |
|                 | urel-273: (2)                                                                     | Capetown, South Africa: 1                         |
|                 | urel-274: (1)                                                                     | Capetown, South Africa: 1                         |
|                 | urel-279: (1)                                                                     | Capetown, South Africa: 1                         |
|                 | urel-288: (3)                                                                     | Capetown, South Africa: 1                         |
|                 | yphC-273: (2)                                                                     | Capetown, South Africa: 2                         |
|                 | yphC-279: (1)                                                                     | Capetown, South Africa: 5                         |
|                 | yphC-306: (2)                                                                     | Capetown, South Africa: 1                         |
|                 | Total ST sources: Capetown: 33; Namibia: 1; Nigeria: 1                            |                                                   |
