# Supplementary material for: Horizontal versus Familial Transmission of Helicobacter pylori
Source: PubMed Central journal article supplement (PMC2563686; doi:10.1371/journal.ppat.1000180), 2008-10-24

Family 12

**29C (hpAfrica1)**

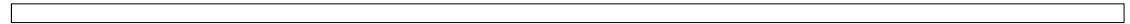

**29A (hpAfrica2)**

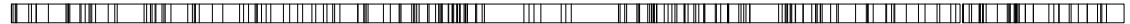

**172A (hpEurope)**

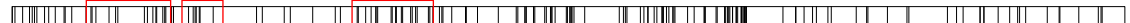

**172C (hpAfrica2)**

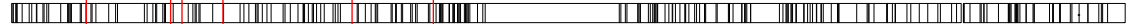

Family 13

**174A (hpAfrica2)**

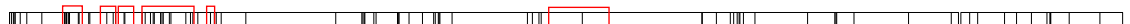

**174C (hpEurope)**

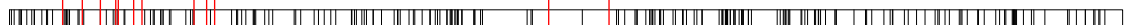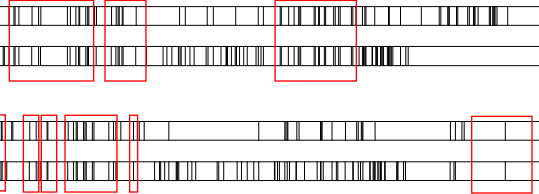

Supplement: ppat.1000180.s006.pdf [file ppat.1000180.s006.pdf]
